# Supplementary material for: Metabolic Adjustments following Glutaminase Inhibition by CB-839 in Glioblastoma Cell Lines
Source: MDPI journal article supplement (doi:10.3390/cancers15020531), 2023-01-15
Supplement: s1 [file s1]

**Supplementary Table S1.** Significantly altered metabolites in T98G cell line treated with CB-839 1  $\mu$ M. Abundances are provided as the normalized abundance mean of triplicates. Fold change is calculated by dividing mean abundance of the treated samples by the mean abundance of the control sample. The total ion count of the sample was used for normalizing each metabolite abundance.

| Compound Name                          | T98G<br>(Normalized<br>metabolite<br>abundance) | SD        | T98G +CB-<br>839 1 $\mu$ M<br>(Normalized<br>metabolite<br>abundance) | SD        | Fold Change<br>(T98G +CB-<br>839 1<br>$\mu$ M/T98G) | p-value<br>(Student's<br>T Test) |
|----------------------------------------|-------------------------------------------------|-----------|-----------------------------------------------------------------------|-----------|-----------------------------------------------------|----------------------------------|
| 1-METHYLADENOSINE                      | 1,658E-05                                       | 5,396E-06 | 5,747E-05                                                             | 6,818E-06 | 3,466                                               | 0,00124                          |
| 1-METHYL-L-HISTIDINE                   | 1,672E-04                                       | 1,703E-05 | 2,059E-04                                                             | 1,743E-06 | 1,231                                               | 0,01741                          |
| 2-AMINOPHENOL-2                        | 1,371E-05                                       | 1,893E-06 | 8,449E-06                                                             | 1,057E-06 | 0,616                                               | 0,01366                          |
| 2-ETHYL-2-HYDROXYBUTYRIC<br>ACID       | 4,000E-06                                       | 5,810E-07 | 2,261E-06                                                             | 8,998E-07 | 0,565                                               | 0,04823                          |
| 2-HYDROXYBUTYRATE                      | 4,961E-05                                       | 4,744E-06 | 3,199E-05                                                             | 7,723E-06 | 0,645                                               | 0,02814                          |
| 2-HYDROXYGLUTARIC                      | 4,735E-04                                       | 1,589E-05 | 1,023E-04                                                             | 1,062E-05 | 0,216                                               | 0,00000                          |
| 3-(2-<br>HYDROXYPHENYL)PROPANOATE      | 1,802E-05                                       | 6,758E-06 | 3,889E-05                                                             | 2,475E-06 | 2,158                                               | 0,00738                          |
| 3,4-<br>DIHYDROXYHYDROCINNAMIC<br>ACID | 3,228E-04                                       | 6,436E-06 | 1,089E-03                                                             | 3,663E-05 | 3,375                                               | 0,00000                          |
| 3-HYDROXYBENZALDEHYDE                  | 3,109E-05                                       | 7,152E-06 | 6,372E-05                                                             | 4,677E-06 | 2,050                                               | 0,00271                          |
| 3-METHOXYTYROSINE                      | 1,037E-05                                       | 1,226E-06 | 1,506E-05                                                             | 1,734E-06 | 1,452                                               | 0,01869                          |
| 3-METHYL-2-OXOVALERATE                 | 5,072E-04                                       | 8,511E-05 | 1,971E-04                                                             | 3,010E-05 | 0,389                                               | 0,00401                          |
| 3-METHYLADENINE-3                      | 7,098E-05                                       | 4,754E-06 | 1,905E-04                                                             | 1,964E-05 | 2,685                                               | 0,00051                          |
| 4-ACETAMIDOBUTANOATE                   | 5,473E-05                                       | 4,084E-06 | 8,970E-05                                                             | 6,129E-06 | 1,639                                               | 0,00119                          |
| 4-GUANIDINOBUTANOATE-2                 | 2,123E-04                                       | 7,568E-06 | 1,298E-04                                                             | 6,497E-06 | 0,611                                               | 0,00014                          |
| 4-HYDROXYPHENYL-2-<br>PROPIONIC ACID   | 1,762E-05                                       | 6,116E-06 | 3,780E-05                                                             | 1,487E-06 | 2,145                                               | 0,00515                          |
| 5-AMINOPENTANOATE                      | 2,783E-03                                       | 3,945E-04 | 4,473E-03                                                             | 2,194E-04 | 1,607                                               | 0,00292                          |
| 5-AMINOPENTANOIC ACID                  | 6,019E-05                                       | 1,874E-06 | 8,908E-06                                                             | 9,847E-07 | 0,148                                               | 0,00000                          |
| 5-HYDROXYTRYPTOPHAN                    | 3,519E-05                                       | 1,344E-06 | 3,871E-05                                                             | 1,502E-06 | 1,100                                               | 0,03899                          |
| 5-METHYLCYTOSINE                       | 1,239E-05                                       | 6,635E-07 | 2,740E-04                                                             | 4,157E-05 | 22,113                                              | 0,00040                          |
| 5-METHYLURIDINE                        | 2,217E-05                                       | 2,650E-06 | 1,670E-05                                                             | 1,209E-06 | 0,753                                               | 0,03131                          |
| 6-HYDROXYDOPAMINE                      | 1,626E-05                                       | 3,057E-06 | 7,881E-05                                                             | 3,386E-06 | 4,847                                               | 0,00002                          |
| 7-HYDROXYOCTANOATE                     | 1,284E-06                                       | 1,075E-06 | 4,514E-06                                                             | 1,087E-06 | 3,515                                               | 0,02157                          |
| ACETOACETATE                           | 3,433E-05                                       | 7,813E-07 | 5,796E-06                                                             | 2,112E-07 | 0,169                                               | 0,00000                          |
| AICAR                                  | 1,507E-05                                       | 9,261E-06 | 1,457E-04                                                             | 1,362E-05 | 9,671                                               | 0,00016                          |
| ALPHA-KETOISOVALERATE                  | 9,181E-05                                       | 1,041E-05 | 4,625E-05                                                             | 4,708E-06 | 0,504                                               | 0,00230                          |
| AMINOADIPATE                           | 9,535E-04                                       | 1,137E-04 | 1,363E-04                                                             | 7,750E-06 | 0,143                                               | 0,00024                          |
| ARGININOSUCCINATE                      | 7,871E-05                                       | 6,125E-06 | 7,770E-06                                                             | 1,259E-06 | 0,099                                               | 0,00004                          |
| ASPARTATE                              | 6,427E-04                                       | 1,189E-04 | 2,929E-05                                                             | 2,205E-06 | 0,046                                               | 0,00087                          |
| BETAINE                                | 4,209E-03                                       | 4,468E-04 | 1,005E-02                                                             | 3,490E-04 | 2,388                                               | 0,00006                          |
| BUTYRYLCARNITINE                       | 1,504E-02                                       | 5,498E-04 | 5,474E-03                                                             | 9,712E-05 | 0,364                                               | 0,00001                          |
| CDP-ETHANOLAMINE                       | 2,297E-03                                       | 1,680E-04 | 1,889E-03                                                             | 7,672E-05 | 0,822                                               | 0,01858                          |
| CIS-ACONITATE-1                        | 2,298E-04                                       | 8,716E-06 | 2,509E-05                                                             | 4,617E-06 | 0,109                                               | 0,00000                          |

|                              |           |           |           |           |        |         |
|------------------------------|-----------|-----------|-----------|-----------|--------|---------|
| CIS-ACONITATE-2              | 1,029E-04 | 1,513E-06 | 3,988E-05 | 2,499E-06 | 0,388  | 0,00000 |
| CITRATE                      | 1,246E-02 | 6,716E-04 | 1,262E-03 | 7,546E-05 | 0,101  | 0,00001 |
| CITRULLINE                   | 5,343E-05 | 4,878E-06 | 9,968E-05 | 4,097E-06 | 1,865  | 0,00023 |
| CREATINE                     | 2,703E-02 | 6,798E-04 | 3,100E-02 | 5,150E-04 | 1,147  | 0,00128 |
| CYCLIC AMP                   | 1,365E-04 | 6,340E-06 | 1,093E-04 | 5,195E-06 | 0,800  | 0,00452 |
| CYCLIC GMP                   | 1,151E-04 | 1,147E-05 | 8,208E-05 | 8,289E-06 | 0,713  | 0,01555 |
| DECADIENOYL Carnitine-2      | 1,208E-04 | 6,959E-06 | 1,542E-04 | 1,639E-05 | 1,277  | 0,03139 |
| DECENOYL Carnitine           | 8,520E-06 | 6,212E-07 | 2,721E-06 | 1,232E-06 | 0,319  | 0,00189 |
| DEOXYADENOSINE MONOPHOSPHATE | 2,792E-05 | 4,163E-06 | 1,108E-05 | 3,298E-06 | 0,397  | 0,00536 |
| DEOXYCYTIDINE-1              | 4,160E-06 | 2,748E-06 | 2,216E-05 | 3,530E-06 | 5,328  | 0,00223 |
| DEOXYCYTIDINE-DIPHOSPHATE    | 1,439E-05 | 2,321E-06 | 8,914E-06 | 1,797E-06 | 0,619  | 0,03188 |
| DEOXYGUANOSINE-MONOPHOSPHATE | 1,409E-03 | 4,804E-04 | 5,038E-04 | 2,542E-05 | 0,358  | 0,03110 |
| D-GLUCURONOLACTONE           | 7,075E-05 | 5,445E-06 | 1,250E-04 | 5,999E-06 | 1,767  | 0,00032 |
| DL-2-AMINOCTANOATE           | 1,349E-05 | 4,437E-07 | 2,980E-05 | 1,625E-06 | 2,209  | 0,00007 |
| DOPAMINE-3                   | 1,681E-05 | 4,778E-07 | 8,255E-06 | 6,077E-07 | 0,491  | 0,00004 |
| D-RIBOSE 5-PHOSPHATE         | 1,028E-04 | 6,933E-06 | 1,666E-04 | 1,154E-05 | 1,620  | 0,00120 |
| ETHANOLAMINE PHOSPHATE       | 2,356E-05 | 9,219E-07 | 6,518E-05 | 2,152E-06 | 2,766  | 0,00001 |
| FRUCTOSE 1,6-BISPHOSPHATE    | 1,048E-04 | 2,021E-05 | 1,852E-04 | 2,338E-05 | 1,768  | 0,01073 |
| FRUCTOSE 6-PHOSPHATE         | 3,999E-04 | 1,604E-05 | 8,718E-04 | 6,141E-05 | 2,180  | 0,00021 |
| FUMARATE                     | 1,369E-04 | 1,131E-05 | 2,227E-06 | 1,644E-06 | 0,016  | 0,00054 |
| GLUCONOLACTONE               | 7,117E-06 | 1,813E-06 | 1,452E-05 | 2,493E-06 | 2,040  | 0,01416 |
| GLUTAMATE                    | 4,411E-02 | 3,040E-03 | 7,231E-03 | 5,489E-04 | 0,164  | 0,00003 |
| GLUTAMINE                    | 9,000E-03 | 9,363E-04 | 1,530E-02 | 6,939E-04 | 1,700  | 0,00072 |
| GLUTATHIONE REDUCED          | 1,542E-01 | 6,161E-03 | 1,243E-01 | 2,216E-03 | 0,806  | 0,00138 |
| GLYCERALDEHYDE 3-PHOSPHATE   | 2,255E-04 | 2,170E-05 | 1,652E-04 | 6,111E-06 | 0,732  | 0,00976 |
| GLYCERATE                    | 4,441E-05 | 6,668E-06 | 1,528E-05 | 2,180E-06 | 0,344  | 0,00198 |
| GLYCEROL 3-PHOSPHATE         | 7,803E-05 | 1,028E-05 | 1,238E-04 | 9,691E-06 | 1,586  | 0,00496 |
| GLYCINE                      | 1,873E-05 | 1,622E-06 | 4,229E-05 | 9,155E-06 | 2,257  | 0,01180 |
| GUANINE-2                    | 6,512E-04 | 4,562E-05 | 7,953E-04 | 3,384E-05 | 1,221  | 0,01174 |
| HEXANOYL Carnitine           | 5,066E-05 | 6,088E-06 | 2,182E-05 | 8,199E-06 | 0,431  | 0,00810 |
| HISTIDINE                    | 3,181E-04 | 1,413E-05 | 3,898E-04 | 9,041E-06 | 1,225  | 0,00178 |
| HOMOCYSTEINE THIOLACTONE     | 2,199E-05 | 3,213E-06 | 3,051E-05 | 3,532E-06 | 1,388  | 0,03650 |
| HOMOSERINE                   | 3,500E-04 | 2,755E-05 | 5,369E-04 | 3,398E-05 | 1,534  | 0,00178 |
| HYDROQUINONE                 | 1,263E-05 | 1,115E-06 | 8,113E-06 | 3,775E-07 | 0,643  | 0,00267 |
| HYDROXYPHENYLACTATE          | 3,225E-04 | 6,224E-06 | 1,089E-03 | 3,632E-05 | 3,376  | 0,00000 |
| HYPOXANTHINE                 | 6,582E-04 | 3,000E-04 | 4,354E-03 | 7,411E-05 | 6,616  | 0,00003 |
| INDOLEACETALDEHYDE           | 3,577E-06 | 1,317E-06 | 6,371E-06 | 9,102E-07 | 1,781  | 0,03905 |
| INOSINE MONOPHOSPHATE        | 4,384E-04 | 1,906E-05 | 6,959E-03 | 2,865E-04 | 15,874 | 0,00000 |
| ISOCITRATE                   | 3,486E-04 | 2,006E-05 | 7,720E-05 | 2,198E-05 | 0,221  | 0,00009 |
| ISOLEUCINE                   | 1,118E-02 | 2,387E-03 | 1,543E-02 | 8,244E-04 | 1,380  | 0,04352 |
| ISOVALERYL Carnitine         | 1,316E-02 | 4,365E-04 | 3,888E-03 | 2,202E-04 | 0,296  | 0,00001 |
| KYNURENINE                   | 4,562E-04 | 4,670E-05 | 5,774E-04 | 1,208E-05 | 1,266  | 0,01215 |

|                             |           |           |           |           |        |         |
|-----------------------------|-----------|-----------|-----------|-----------|--------|---------|
| L-ALANINE                   | 1,619E-04 | 3,026E-05 | 1,229E-05 | 8,211E-07 | 0,076  | 0,00102 |
| L-CARNITINE                 | 4,001E-02 | 1,147E-03 | 1,097E-02 | 5,009E-04 | 0,274  | 0,00000 |
| LEUCINE                     | 3,157E-02 | 5,731E-03 | 4,628E-02 | 5,638E-03 | 1,466  | 0,03394 |
| MALATE                      | 5,269E-03 | 1,176E-03 | 2,496E-04 | 3,015E-05 | 0,047  | 0,00179 |
| METHIONINE SULFOXIDE        | 2,101E-05 | 1,431E-06 | 3,873E-05 | 3,384E-06 | 1,844  | 0,00112 |
| METHIONINE-1                | 5,014E-03 | 1,365E-04 | 6,625E-03 | 5,849E-04 | 1,321  | 0,00969 |
| METHIONINE-2                | 1,263E-02 | 1,006E-03 | 1,761E-02 | 1,250E-03 | 1,394  | 0,00579 |
| METHYLTHIOADENOSINE         | 6,672E-03 | 2,910E-04 | 8,416E-03 | 7,107E-04 | 1,261  | 0,01705 |
| N,N,N-TRIMETHYLLYSINE       | 1,975E-05 | 2,371E-06 | 4,287E-05 | 8,039E-06 | 2,171  | 0,00879 |
| N1-ACETYLSPERMINE           | 1,218E-06 | 6,464E-07 | 3,173E-06 | 8,812E-07 | 2,604  | 0,03631 |
| N-A-ACETYL-L-ARGININE       | 1,822E-05 | 4,054E-06 | 3,228E-05 | 5,432E-06 | 1,772  | 0,02289 |
| N-ACETYLLALANINE            | 2,691E-04 | 2,971E-05 | 2,026E-04 | 2,674E-05 | 0,753  | 0,04494 |
| N-ACETYLASPARAGINE          | 1,555E-05 | 1,983E-06 | 5,267E-05 | 6,010E-06 | 3,386  | 0,00053 |
| N-ACETYLSPARTATE            | 4,670E-03 | 1,455E-04 | 3,281E-03 | 1,113E-04 | 0,702  | 0,00019 |
| N-ACETYLSPARTYLGLUTAMATE    | 5,940E-04 | 2,375E-05 | 4,473E-04 | 1,769E-05 | 0,753  | 0,00101 |
| N-ACETYLGLUTAMATE           | 9,178E-04 | 2,805E-05 | 1,443E-03 | 5,271E-05 | 1,573  | 0,00011 |
| N-ACETYLGLYCINE             | 3,791E-05 | 3,366E-06 | 8,547E-05 | 5,256E-06 | 2,255  | 0,00019 |
| N-ACETYLMETHIONINE          | 7,901E-04 | 6,934E-05 | 6,582E-04 | 3,850E-05 | 0,833  | 0,04504 |
| N-ACETYLNEURAMINATE         | 7,720E-04 | 7,457E-05 | 6,211E-04 | 5,070E-05 | 0,805  | 0,04419 |
| N-ACETYLPHENYLALANINE       | 9,838E-06 | 8,748E-07 | 1,699E-05 | 2,148E-06 | 1,727  | 0,00591 |
| N-ACETYSERINE               | 2,205E-04 | 4,604E-05 | 6,146E-04 | 4,073E-05 | 2,787  | 0,00037 |
| N-FORMYL-L-METHIONINE       | 6,883E-05 | 2,637E-06 | 8,585E-05 | 8,919E-06 | 1,247  | 0,03382 |
| NICOTINAMIDE MONONUCLEOTIDE | 9,565E-05 | 1,941E-05 | 1,336E-04 | 1,313E-05 | 1,397  | 0,04849 |
| N-METHYLGLUTAMATE           | 1,312E-03 | 1,798E-04 | 2,148E-04 | 7,634E-06 | 0,164  | 0,00046 |
| O-ACETYLCARNITINE           | 1,935E-03 | 1,134E-04 | 2,200E-02 | 6,218E-05 | 11,372 | 0,00000 |
| O-ACETYLCARNITINE-2         | 8,652E-03 | 5,022E-04 | 9,909E-02 | 1,461E-03 | 11,453 | 0,00000 |
| O-ACETYLSERINE              | 1,510E-02 | 1,877E-03 | 2,225E-03 | 5,345E-05 | 0,147  | 0,00029 |
| O-SUCCINYL-HOMOSERINE-1     | 4,497E-05 | 3,115E-06 | 1,099E-05 | 2,960E-06 | 0,244  | 0,00016 |
| OXOGLUTARATE                | 6,531E-05 | 9,362E-06 | 4,894E-06 | 2,590E-06 | 0,075  | 0,00042 |
| PHENYLALANINE               | 9,318E-02 | 7,782E-03 | 1,123E-01 | 4,278E-03 | 1,205  | 0,02046 |
| PHENYLLACTATE               | 1,794E-05 | 6,430E-06 | 3,884E-05 | 2,761E-06 | 2,165  | 0,00663 |
| PHOSPHORYLCHOLINE           | 1,266E-02 | 6,604E-04 | 1,950E-02 | 1,599E-03 | 1,540  | 0,00238 |
| PHOSPHOSERINE               | 1,536E-05 | 2,252E-06 | 4,212E-06 | 4,613E-07 | 0,274  | 0,00110 |
| PIPECOLATE                  | 3,420E-04 | 1,246E-05 | 8,811E-04 | 3,120E-05 | 2,576  | 0,00001 |
| P-OCTOPAMINE                | 1,457E-06 | 7,002E-07 | 3,576E-06 | 4,659E-07 | 2,455  | 0,01202 |
| PORPHOBILINOGEN-2           | 2,185E-05 | 2,233E-06 | 8,799E-06 | 6,865E-07 | 0,403  | 0,00064 |
| PROLINE                     | 6,248E-03 | 7,396E-04 | 4,041E-03 | 1,401E-04 | 0,647  | 0,00708 |
| PROPIONYLCARNITINE          | 3,150E-02 | 8,314E-04 | 2,005E-02 | 1,247E-03 | 0,636  | 0,00019 |
| PYRIDOXAL-PHOSPHATE         | 4,790E-05 | 6,219E-06 | 6,514E-05 | 6,693E-06 | 1,360  | 0,03082 |
| PYRIDOXINE-1                | 1,173E-04 | 6,840E-06 | 8,920E-05 | 3,844E-07 | 0,761  | 0,00209 |
| PYRIDOXINE-2                | 1,203E-04 | 3,056E-06 | 8,753E-05 | 9,721E-07 | 0,728  | 0,00006 |
| PYROGLUTAMATE               | 1,749E-03 | 1,117E-04 | 1,332E-03 | 1,279E-04 | 0,762  | 0,01313 |
| PYRUVATE                    | 2,288E-05 | 3,929E-06 | 1,026E-05 | 3,081E-06 | 0,448  | 0,01189 |
| SARCOSINE                   | 4,451E-04 | 1,830E-05 | 5,142E-04 | 3,337E-06 | 1,155  | 0,00301 |

|                           |           |           |           |           |       |         |
|---------------------------|-----------|-----------|-----------|-----------|-------|---------|
| SEDOHEPTULOSE-7-PHOSPHATE | 5,304E-05 | 6,967E-06 | 2,301E-04 | 2,519E-05 | 4,337 | 0,00030 |
| SPERMIDINE                | 1,960E-02 | 2,409E-03 | 2,456E-02 | 7,322E-04 | 1,253 | 0,02697 |
| SPERMINE                  | 7,077E-03 | 1,353E-03 | 4,555E-03 | 3,211E-04 | 0,644 | 0,03479 |
| SUCCINATE                 | 6,391E-04 | 8,647E-05 | 4,075E-04 | 8,638E-05 | 0,638 | 0,03045 |
| THREONINE                 | 2,605E-04 | 6,345E-05 | 3,761E-04 | 2,781E-05 | 1,444 | 0,04455 |
| THYMIDINE-MONOPHOSPHATE   | 4,339E-04 | 1,010E-04 | 2,231E-04 | 6,699E-05 | 0,514 | 0,03942 |
| TRANS-ACONITATE           | 5,971E-05 | 6,782E-06 | 1,610E-05 | 5,903E-06 | 0,270 | 0,00110 |
| TRIGONELLINE              | 3,416E-04 | 1,159E-05 | 2,128E-04 | 1,630E-05 | 0,623 | 0,00037 |
| TRIMETHYLAMINE            | 1,358E-05 | 2,285E-06 | 4,555E-06 | 6,643E-07 | 0,335 | 0,00278 |
| TRYPTOPHAN                | 8,823E-03 | 1,640E-04 | 1,269E-02 | 6,387E-04 | 1,438 | 0,00053 |
| TYRAMINE                  | 9,090E-06 | 4,349E-06 | 1,829E-05 | 5,618E-07 | 2,012 | 0,02209 |
| TYROSINE                  | 2,085E-02 | 1,268E-03 | 3,167E-02 | 2,174E-03 | 1,519 | 0,00174 |
| URACIL-1                  | 4,213E-05 | 1,451E-07 | 2,073E-05 | 2,652E-06 | 0,492 | 0,00015 |
| URIDINE MONOPHOSPHATE     | 2,648E-03 | 9,980E-05 | 1,273E-03 | 2,862E-04 | 0,481 | 0,00142 |
| VALINE                    | 2,664E-04 | 2,806E-05 | 5,466E-04 | 3,920E-05 | 2,052 | 0,00055 |

**Supplementary Table S2.** Significantly altered metabolites in LN229 cell line treated with CB-839 1  $\mu$ M. Abundances are provided as the normalized abundance mean of triplicates. Fold change is calculated by dividing mean abundance of the treated samples by the mean abundance of the control sample. The total ion count of the sample was used for normalizing each metabolite abundance.

| Compound Name                    | LN229     | SD        | LN229 +CB-839 1 $\mu$ M | SD        | Fold Change (LN229 +CB-839 1 $\mu$ M/LN229) | p-value (Student's T Test) |
|----------------------------------|-----------|-----------|-------------------------|-----------|---------------------------------------------|----------------------------|
| 1-AMINOCYCLOPROPANECARBOXYLATE   | 1,500E-05 | 2,080E-06 | 2,050E-06               | 6,530E-07 | 0,137                                       | 0,00000                    |
| 2-ETHYL-2-HYDROXYBUTYRIC ACID    | 9,210E-06 | 1,250E-06 | 6,930E-06               | 1,850E-06 | 0,753                                       | 0,03180                    |
| 2-HYDROXYGLUTARIC                | 2,020E-04 | 2,490E-05 | 1,600E-04               | 2,790E-05 | 0,792                                       | 0,02060                    |
| 3-(2-HYDROXYPHENYL)PROPANOATE    | 8,610E-06 | 1,980E-06 | 2,180E-05               | 3,240E-06 | 2,529                                       | 0,00001                    |
| 3,4-DIHYDROXYHYDROCINNAMIC ACID  | 2,910E-04 | 4,010E-05 | 1,910E-03               | 2,050E-04 | 6,549                                       | 0,00000                    |
| 3,4-DIHYDROXYPHENYLACETATE-1     | 9,080E-06 | 2,460E-06 | 1,300E-05               | 1,940E-06 | 1,433                                       | 0,01175                    |
| 3,4-DIHYDROXYPHENYLACETATE-2     | 1,630E-05 | 2,900E-06 | 2,310E-05               | 5,910E-06 | 1,418                                       | 0,02960                    |
| 3-AMINO-5-HYDROXYBENZOATE        | 8,440E-06 | 3,510E-06 | 2,670E-06               | 2,070E-06 | 0,316                                       | 0,00606                    |
| 3-HYDROXYOCTANOIC ACID           | 1,360E-05 | 2,780E-06 | 8,610E-06               | 1,020E-06 | 0,635                                       | 0,00218                    |
| 3-METHOXYTYROSINE                | 5,400E-06 | 8,270E-07 | 6,740E-06               | 9,180E-07 | 1,247                                       | 0,02458                    |
| 3-METHYLADENINE-3                | 7,730E-05 | 1,760E-05 | 2,000E-04               | 1,090E-05 | 2,584                                       | 0,00000                    |
| 3-PHOSPHOGLYCERATE               | 2,870E-05 | 7,260E-06 | 1,820E-05               | 2,850E-06 | 0,636                                       | 0,00832                    |
| 3-SULFINOALANINE                 | 1,840E-05 | 3,640E-06 | 1,190E-05               | 1,280E-06 | 0,647                                       | 0,00211                    |
| 4-ACETAMIDOBUTANOATE             | 3,920E-05 | 8,520E-06 | 7,860E-05               | 5,410E-06 | 2,006                                       | 0,00000                    |
| 4-GUANIDINOBUTANOATE             | 6,300E-05 | 6,640E-06 | 4,380E-05               | 2,900E-06 | 0,695                                       | 0,00007                    |
| 4-GUANIDINOBUTANOATE-2           | 2,530E-04 | 3,610E-05 | 2,060E-04               | 1,100E-05 | 0,816                                       | 0,01275                    |
| 4-HYDROXYPHENYL-2-PROPIONIC ACID | 7,500E-06 | 2,490E-06 | 2,120E-05               | 3,130E-06 | 2,826                                       | 0,00001                    |
| 5-AMINOPENTANOATE                | 4,480E-03 | 1,280E-03 | 6,300E-03               | 1,350E-03 | 1,405                                       | 0,03809                    |
| 5-AMINOPENTANOIC ACID            | 1,130E-05 | 1,980E-06 | 5,500E-06               | 1,700E-06 | 0,488                                       | 0,00030                    |
| 6-HYDROXYDOPAMINE                | 1,860E-05 | 3,430E-06 | 3,080E-05               | 4,970E-06 | 1,653                                       | 0,00059                    |
| 6-PHOSPHONOGLUCONO-D-LACTONE     | 1,090E-05 | 6,260E-06 | 4,170E-06               | 1,620E-06 | 0,382                                       | 0,03025                    |
| 8-HYDROXY-DEOXYGUANOSINE         | 3,100E-04 | 3,710E-05 | 5,400E-04               | 1,010E-04 | 1,743                                       | 0,00038                    |
| ACETOACETATE                     | 1,110E-05 | 3,120E-06 | 7,230E-06               | 2,260E-06 | 0,651                                       | 0,03356                    |
| ACETOIN                          | 2,060E-05 | 4,000E-06 | 2,960E-05               | 6,920E-06 | 1,435                                       | 0,02050                    |
| ALPHA-KETOISOVALERATE            | 2,350E-05 | 4,750E-06 | 3,070E-05               | 5,850E-06 | 1,306                                       | 0,04141                    |
| AMINOADIPATE                     | 1,690E-04 | 2,740E-05 | 6,640E-05               | 4,850E-06 | 0,392                                       | 0,00000                    |
| ARGININE                         | 4,990E-04 | 9,320E-05 | 6,670E-04               | 1,130E-04 | 1,337                                       | 0,01828                    |
| ARGININOSUCCINATE                | 5,640E-05 | 8,280E-06 | 3,530E-05               | 9,690E-06 | 0,625                                       | 0,00228                    |
| ASPARTATE                        | 7,590E-04 | 1,020E-04 | 4,220E-05               | 4,930E-06 | 0,056                                       | 0,00000                    |
| BETAINE                          | 1,520E-03 | 3,700E-04 | 3,200E-03               | 5,470E-04 | 2,099                                       | 0,00010                    |
| BIS(2-ETHYLHEXYL)PHTHALATE       | 9,240E-05 | 4,870E-05 | 2,630E-04               | 1,790E-04 | 2,840                                       | 0,04839                    |
| BUTYRYLCARNITINE                 | 1,850E-02 | 1,910E-03 | 1,500E-02               | 2,090E-03 | 0,813                                       | 0,01332                    |
| CHENODEOXYCHOLIC ACID            | 1,350E-05 | 1,130E-05 | 1,120E-04               | 1,060E-04 | 8,326                                       | 0,04714                    |
| CIS-ACONITATE-1                  | 1,700E-04 | 5,820E-05 | 1,130E-04               | 2,090E-05 | 0,666                                       | 0,04758                    |
| CIS-ACONITATE-2                  | 5,030E-05 | 1,910E-05 | 2,750E-05               | 3,750E-06 | 0,547                                       | 0,01677                    |
| CITRATE                          | 1,020E-02 | 3,580E-03 | 6,020E-03               | 1,210E-03 | 0,592                                       | 0,02246                    |
| CITRULLINE                       | 5,280E-05 | 6,880E-06 | 6,990E-05               | 6,750E-06 | 1,324                                       | 0,00146                    |
| CYCLIC AMP                       | 1,650E-04 | 3,860E-05 | 1,040E-04               | 1,370E-05 | 0,627                                       | 0,00420                    |
| CYSTATHIONINE                    | 8,130E-06 | 1,580E-06 | 6,310E-06               | 7,030E-07 | 0,776                                       | 0,02777                    |

|                           |           |           |           |           |       |         |
|---------------------------|-----------|-----------|-----------|-----------|-------|---------|
| CYSTEINE                  | 6,580E-06 | 2,040E-06 | 1,560E-05 | 5,300E-06 | 2,377 | 0,00292 |
| DECANOYLCARNITINE         | 8,200E-05 | 8,910E-06 | 7,030E-05 | 5,520E-06 | 0,858 | 0,02127 |
| DEOXYCARNITINE            | 9,760E-03 | 1,010E-03 | 8,050E-03 | 3,340E-04 | 0,824 | 0,00267 |
| DEOXYCHOLATE              | 1,350E-05 | 1,130E-05 | 1,120E-04 | 1,070E-04 | 8,307 | 0,04793 |
| DEOXYCHOLIC ACID          | 1,360E-05 | 1,130E-05 | 1,120E-04 | 1,070E-04 | 8,256 | 0,04790 |
| DEOXYCYTIDINE-1           | 2,170E-06 | 5,860E-07 | 7,050E-06 | 2,690E-06 | 3,247 | 0,00146 |
| DEOXYURIDINE              | 2,010E-06 | 7,190E-07 | 3,400E-06 | 1,120E-06 | 1,693 | 0,02855 |
| D-GLUCURONOLACTONE        | 3,870E-05 | 1,040E-05 | 5,960E-05 | 8,620E-06 | 1,542 | 0,00344 |
| DL-2-AMINOCTANOATE        | 1,370E-05 | 4,140E-06 | 2,030E-05 | 4,260E-06 | 1,489 | 0,02043 |
| D-RIBOSE 5-PHOSPHATE      | 3,430E-05 | 8,940E-06 | 4,880E-05 | 6,720E-06 | 1,421 | 0,01011 |
| ETHANOLAMINE PHOSPHATE    | 8,870E-06 | 1,890E-06 | 1,870E-05 | 1,510E-06 | 2,104 | 0,00000 |
| FRUCTOSE 1,6-BISPHOSPHATE | 3,620E-05 | 3,710E-06 | 8,460E-05 | 1,360E-05 | 2,334 | 0,00001 |
| FRUCTOSE 6-PHOSPHATE      | 1,900E-04 | 2,050E-05 | 2,670E-04 | 2,760E-05 | 1,410 | 0,00025 |
| FUMARATE                  | 1,240E-04 | 3,010E-05 | 2,170E-05 | 6,840E-06 | 0,176 | 0,00001 |
| GLUTAMATE                 | 2,660E-02 | 3,270E-03 | 7,320E-03 | 7,290E-04 | 0,275 | 0,00000 |
| GLUTAMINE                 | 8,270E-03 | 1,060E-03 | 1,180E-02 | 1,120E-03 | 1,422 | 0,00024 |
| GLUTARATE                 | 6,300E-05 | 1,050E-05 | 9,000E-05 | 1,710E-05 | 1,428 | 0,00804 |
| GLUTATHIONE REDUCED       | 9,070E-02 | 1,110E-02 | 6,710E-02 | 9,630E-03 | 0,740 | 0,00281 |
| GLYCINE                   | 1,020E-05 | 1,890E-06 | 1,930E-05 | 3,560E-06 | 1,897 | 0,00025 |
| GUANINE-1                 | 5,130E-04 | 1,430E-04 | 9,770E-04 | 1,900E-04 | 1,904 | 0,00075 |
| GUANINE-2                 | 8,680E-04 | 2,180E-04 | 1,110E-03 | 1,340E-04 | 1,274 | 0,04607 |
| GUANOSINE                 | 1,620E-04 | 3,910E-05 | 3,140E-04 | 8,770E-05 | 1,944 | 0,00298 |
| GUANOSINE MONOPHOSPHATE   | 9,690E-04 | 1,580E-04 | 7,310E-04 | 1,530E-04 | 0,755 | 0,02446 |
| HEXOSE                    | 1,260E-04 | 1,800E-05 | 6,260E-05 | 1,730E-05 | 0,498 | 0,00010 |
| HOMOCYSTEINE THIOLACTONE  | 1,820E-05 | 1,330E-06 | 2,260E-05 | 1,610E-06 | 1,248 | 0,00036 |
| HOMOSERINE                | 4,380E-04 | 7,770E-05 | 5,640E-04 | 6,150E-05 | 1,288 | 0,01087 |
| HYDROXYKYNURENINE         | 1,640E-05 | 3,780E-06 | 1,260E-05 | 1,020E-06 | 0,770 | 0,03982 |
| HYDROXYPHENYLACTATE       | 2,900E-04 | 4,010E-05 | 1,910E-03 | 2,050E-04 | 6,572 | 0,00000 |
| HYPOXANTHINE              | 3,700E-04 | 1,270E-04 | 7,920E-04 | 1,680E-04 | 2,141 | 0,00063 |
| INDOLEACETALDEHYDE        | 2,010E-06 | 6,360E-07 | 9,100E-06 | 2,280E-06 | 4,537 | 0,00003 |
| INOSINE                   | 2,700E-04 | 5,930E-05 | 6,460E-04 | 2,580E-04 | 2,392 | 0,00598 |
| INOSINE MONOPHOSPHATE     | 2,220E-04 | 4,120E-05 | 4,810E-04 | 4,620E-05 | 2,170 | 0,00000 |
| ISOLEUCINE                | 1,730E-02 | 4,090E-03 | 2,330E-02 | 2,680E-03 | 1,349 | 0,01279 |
| KYNURENINE                | 2,820E-04 | 3,280E-05 | 3,360E-04 | 2,370E-05 | 1,191 | 0,00860 |
| L-ALANINE                 | 1,620E-04 | 1,590E-05 | 9,150E-06 | 2,230E-06 | 0,057 | 0,00000 |
| L-CARNITINE               | 3,640E-02 | 2,490E-03 | 2,620E-02 | 1,050E-03 | 0,719 | 0,00000 |
| LEUCINE                   | 4,310E-02 | 7,680E-03 | 5,770E-02 | 7,850E-03 | 1,338 | 0,00866 |
| L-ORNITHINE               | 6,770E-05 | 9,010E-06 | 9,580E-05 | 1,040E-05 | 1,416 | 0,00053 |
| LYSINE                    | 1,160E-04 | 1,150E-05 | 1,450E-04 | 1,820E-05 | 1,249 | 0,00818 |
| MALATE                    | 4,230E-03 | 5,770E-04 | 8,940E-04 | 1,810E-04 | 0,212 | 0,00000 |
| METHIONINE SULFOXIDE      | 2,230E-05 | 2,520E-06 | 3,560E-05 | 4,320E-06 | 1,598 | 0,00007 |
| METHIONINE-1              | 7,320E-03 | 1,260E-03 | 9,710E-03 | 1,020E-03 | 1,327 | 0,00473 |
| METHIONINE-2              | 1,840E-02 | 3,070E-03 | 2,720E-02 | 3,430E-03 | 1,480 | 0,00085 |
| MEVALONATE                | 4,320E-06 | 8,720E-07 | 2,970E-06 | 8,330E-07 | 0,689 | 0,02144 |
| N,N,N-TRIMETHYLLYSINE     | 1,150E-05 | 2,760E-06 | 1,620E-05 | 3,400E-06 | 1,406 | 0,02556 |
| N-ACETYLASPARAGINE        | 8,640E-06 | 1,250E-06 | 2,550E-05 | 4,570E-06 | 2,957 | 0,00001 |

|                              |           |           |           |           |       |         |
|------------------------------|-----------|-----------|-----------|-----------|-------|---------|
| N-ACETYLASPARTATE            | 1,840E-03 | 3,450E-04 | 1,320E-03 | 1,850E-04 | 0,720 | 0,00914 |
| N-ACETYLGLUTAMATE            | 6,960E-04 | 1,550E-04 | 1,310E-03 | 6,920E-05 | 1,882 | 0,00000 |
| N-ACETYLGLYCINE              | 2,470E-05 | 3,060E-06 | 4,480E-05 | 9,190E-06 | 1,814 | 0,00048 |
| N-ACETYLNEURAMINATE          | 1,130E-03 | 1,780E-04 | 5,570E-04 | 4,220E-05 | 0,492 | 0,00002 |
| N-ACETYLPUTRESCINE           | 5,140E-05 | 1,640E-05 | 3,090E-04 | 9,990E-05 | 6,001 | 0,00010 |
| N-ACETYSERINE                | 1,180E-04 | 1,980E-05 | 2,850E-04 | 5,450E-05 | 2,412 | 0,00004 |
| N-METHYLGLUTAMATE            | 3,190E-04 | 2,480E-05 | 1,260E-04 | 6,010E-06 | 0,396 | 0,00000 |
| O-ACETYLCARNITINE            | 2,110E-03 | 1,930E-04 | 4,230E-03 | 6,070E-04 | 2,006 | 0,00001 |
| O-ACETYLCARNITINE-2          | 9,680E-03 | 7,350E-04 | 2,180E-02 | 3,260E-03 | 2,255 | 0,00000 |
| O-ACETYSERINE                | 1,350E-02 | 1,610E-03 | 3,100E-03 | 1,930E-04 | 0,230 | 0,00000 |
| O-SUCCINYL-HOMOSERINE-1      | 3,750E-05 | 6,180E-06 | 1,560E-05 | 2,040E-06 | 0,416 | 0,00001 |
| OXOGLUTARATE                 | 2,230E-05 | 4,470E-06 | 7,010E-06 | 3,080E-06 | 0,314 | 0,00004 |
| PALMITOYLCARNITINE           | 7,480E-05 | 2,740E-05 | 1,330E-04 | 3,900E-05 | 1,771 | 0,01415 |
| PHENYLALANINE                | 8,760E-02 | 7,660E-03 | 1,030E-01 | 6,360E-03 | 1,175 | 0,00359 |
| PHENYLETHANOLAMINE           | 2,640E-04 | 2,970E-05 | 3,160E-04 | 3,400E-05 | 1,198 | 0,01785 |
| PHENYLACTATE                 | 8,430E-06 | 1,920E-06 | 2,160E-05 | 3,160E-06 | 2,564 | 0,00001 |
| PHOSPHOCREATINE              | 1,080E-04 | 3,610E-05 | 4,520E-05 | 2,020E-05 | 0,419 | 0,00404 |
| PHOSPHORYLCHOLINE            | 2,900E-02 | 3,470E-03 | 3,690E-02 | 5,880E-03 | 1,274 | 0,01740 |
| PHOSPHOSERINE                | 1,210E-05 | 2,480E-06 | 3,040E-06 | 6,360E-07 | 0,251 | 0,00001 |
| PIPECOLATE                   | 9,810E-05 | 1,130E-05 | 4,970E-04 | 7,650E-05 | 5,066 | 0,00000 |
| PORPHOBILINOGEN-2            | 3,010E-05 | 5,050E-06 | 2,190E-05 | 2,660E-06 | 0,727 | 0,00540 |
| PROLINE                      | 8,280E-03 | 2,110E-03 | 1,190E-03 | 4,480E-04 | 0,144 | 0,00001 |
| PROPIONYLCHOLINE             | 9,410E-05 | 1,970E-05 | 5,690E-05 | 1,350E-05 | 0,604 | 0,00341 |
| PUTRESCINE-NH3               | 1,840E-04 | 2,570E-05 | 2,380E-04 | 1,670E-05 | 1,299 | 0,00137 |
| PYROGLUTAMATE                | 2,200E-03 | 2,960E-04 | 2,910E-03 | 4,990E-04 | 1,319 | 0,01417 |
| PYRUVATE                     | 1,910E-05 | 3,980E-06 | 7,730E-06 | 1,590E-06 | 0,405 | 0,00007 |
| S-ADENOSYLMHOCYSTEINE-1      | 2,370E-04 | 4,850E-05 | 1,470E-04 | 5,920E-05 | 0,622 | 0,01688 |
| SALSOLINOL-1                 | 5,530E-04 | 7,120E-05 | 4,440E-04 | 4,770E-05 | 0,802 | 0,01052 |
| SALSOLINOL-2                 | 1,750E-03 | 1,600E-04 | 1,450E-03 | 1,760E-04 | 0,829 | 0,01171 |
| SEDOHEPTULOSE-7-PHOSPHATE    | 1,050E-05 | 4,030E-06 | 3,720E-05 | 6,720E-06 | 3,558 | 0,00001 |
| SPERMIDINE                   | 1,720E-02 | 2,990E-03 | 2,270E-02 | 2,110E-03 | 1,315 | 0,00458 |
| SUCCINATE                    | 8,860E-04 | 2,050E-04 | 4,730E-04 | 9,630E-05 | 0,534 | 0,00122 |
| TAURINE                      | 2,380E-03 | 4,830E-04 | 1,170E-03 | 1,510E-04 | 0,492 | 0,00016 |
| THYMIDINE-MONOPHOSPHATE      | 1,070E-04 | 1,790E-05 | 6,530E-05 | 1,910E-05 | 0,609 | 0,00285 |
| TRANS-2-OCTENOYL-L-CARNITINE | 1,170E-03 | 1,250E-04 | 9,490E-04 | 7,220E-05 | 0,808 | 0,00336 |
| TRIGONELLINE                 | 4,020E-04 | 1,050E-04 | 1,330E-04 | 8,350E-06 | 0,331 | 0,00009 |
| TRIMETHYLAMINE               | 1,340E-05 | 2,490E-06 | 1,000E-05 | 2,680E-06 | 0,745 | 0,04445 |
| TRYPTOPHAN                   | 7,790E-03 | 1,180E-03 | 1,140E-02 | 8,400E-04 | 1,465 | 0,00011 |
| TYRAMINE                     | 1,470E-05 | 2,920E-06 | 1,920E-05 | 2,780E-06 | 1,303 | 0,02181 |
| TYROSINE                     | 2,280E-02 | 3,620E-03 | 3,370E-02 | 3,210E-03 | 1,477 | 0,00026 |
| URACIL-1                     | 3,500E-05 | 1,290E-05 | 2,160E-05 | 3,650E-06 | 0,617 | 0,03359 |
| URIDINE MONOPHOSPHATE        | 2,330E-03 | 1,140E-03 | 1,040E-03 | 7,500E-04 | 0,445 | 0,04227 |
| VALINE                       | 3,590E-04 | 3,980E-05 | 4,900E-04 | 7,750E-05 | 1,366 | 0,00417 |
| XANTHOSINE                   | 8,920E-05 | 1,400E-05 | 1,110E-04 | 1,290E-05 | 1,241 | 0,01995 |

**Supplementary Table S3.** Significantly altered metabolites in U87MG cell line treated with CB-839 1  $\mu$ M. Abundances are provided as the normalized abundance mean of triplicates. Fold change is calculated by dividing mean abundance of the treated samples by the mean abundance of the control sample. The total ion count of the sample was used for normalizing each metabolite abundance.

| Compound Name                    | U87MG     | SD        | U87MG +CB-839 1 $\mu$ M | SD        | Fold Change (U87MG +CB-839 1 $\mu$ M/U87MG) | p-value (Student's T Test) |
|----------------------------------|-----------|-----------|-------------------------|-----------|---------------------------------------------|----------------------------|
| 1-AMINOCYCLOPROPANECARBOXYLATE   | 2,318E-05 | 5,545E-07 | 5,077E-06               | 1,955E-06 | 0,219                                       | 0,00010                    |
| 1-METHYL-L-HISTIDINE             | 3,648E-05 | 1,839E-07 | 4,300E-05               | 3,669E-06 | 1,179                                       | 0,03712                    |
| 2-HYDROXYGLUTARIC                | 3,422E-04 | 3,183E-05 | 2,175E-04               | 6,629E-06 | 0,636                                       | 0,00266                    |
| 3-(2-HYDROXYPHENYL)PROPANOATE    | 1,294E-05 | 1,497E-06 | 1,775E-05               | 2,084E-06 | 1,372                                       | 0,03144                    |
| 3,4-DIHYDROXYHYDROCINNAMIC ACID  | 2,310E-04 | 7,982E-06 | 5,984E-04               | 1,507E-05 | 2,590                                       | 0,00000                    |
| 3-AMINO-5-HYDROXYBENZOATE        | 1,879E-06 | 1,971E-07 | 6,365E-06               | 1,176E-06 | 3,387                                       | 0,00286                    |
| 3-HYDROXYBENZALDEHYDE            | 4,180E-06 | 6,194E-07 | 8,727E-06               | 1,785E-06 | 2,088                                       | 0,04509                    |
| 3-METHYLADENINE-3                | 7,221E-05 | 7,652E-06 | 1,781E-04               | 2,537E-05 | 2,466                                       | 0,00229                    |
| 4-ACETAMIDOBUTANOATE             | 2,690E-04 | 2,640E-07 | 3,995E-04               | 1,169E-05 | 1,485                                       | 0,00004                    |
| 4-HYDROXYPHENYL-2-PROPIONIC ACID | 1,106E-05 | 2,632E-06 | 1,626E-05               | 1,176E-06 | 1,470                                       | 0,03539                    |
| 5-AMINOPENTANOIC ACID            | 8,670E-05 | 8,918E-06 | 7,067E-05               | 2,195E-06 | 0,815                                       | 0,03901                    |
| 6-HYDROXYDOPAMINE                | 4,407E-05 | 9,491E-06 | 7,504E-05               | 5,149E-06 | 1,703                                       | 0,00766                    |
| 6-PHOSPHOGLUCONATE               | 6,057E-04 | 1,311E-04 | 3,015E-04               | 2,690E-05 | 0,498                                       | 0,01701                    |
| 6-PHOSPHONOGLUCONO-D-LACTONE     | 3,806E-05 | 6,608E-06 | 1,485E-05               | 6,487E-07 | 0,390                                       | 0,00375                    |
| ACETOACETATE                     | 1,896E-05 | 2,678E-06 | 1,235E-05               | 1,396E-06 | 0,651                                       | 0,01924                    |
| ADENOSINE                        | 3,228E-03 | 3,429E-04 | 1,911E-03               | 3,216E-04 | 0,592                                       | 0,00831                    |
| AICAR                            | 2,534E-06 | 6,207E-07 | 6,706E-06               | 9,360E-07 | 2,646                                       | 0,00300                    |
| ALPHA-KETOISOVALERATE            | 5,321E-05 | 2,133E-06 | 4,343E-05               | 3,915E-06 | 0,816                                       | 0,01910                    |
| AMINOADIPATE                     | 1,351E-03 | 1,807E-04 | 9,727E-04               | 2,721E-05 | 0,720                                       | 0,02309                    |
| ARGININOSUCCINATE                | 2,649E-05 | 1,854E-06 | 9,790E-06               | 1,622E-06 | 0,370                                       | 0,00030                    |
| ASPARTATE                        | 1,644E-04 | 2,712E-05 | 4,887E-05               | 9,896E-06 | 0,297                                       | 0,00227                    |
| BETAINE                          | 1,347E-03 | 5,137E-04 | 2,787E-03               | 2,338E-04 | 2,070                                       | 0,01151                    |
| BUTYRYLCARNITINE                 | 4,425E-03 | 1,968E-04 | 3,677E-03               | 1,444E-04 | 0,831                                       | 0,00608                    |
| CIS-ACONITATE-1                  | 2,808E-04 | 3,137E-05 | 1,303E-04               | 2,512E-06 | 0,464                                       | 0,00116                    |
| CIS-ACONITATE-2                  | 2,015E-04 | 1,023E-05 | 1,234E-04               | 4,628E-06 | 0,613                                       | 0,00027                    |
| CITRATE                          | 1,664E-02 | 2,121E-03 | 7,227E-03               | 3,394E-04 | 0,434                                       | 0,00161                    |
| CITRULLINE                       | 1,627E-05 | 3,243E-06 | 2,950E-05               | 2,507E-06 | 1,814                                       | 0,00502                    |
| DEOXYADENOSINE MONOPHOSPHATE     | 2,023E-05 | 8,570E-07 | 1,213E-05               | 2,543E-06 | 0,600                                       | 0,00640                    |
| DOPAMINE-3                       | 2,722E-05 | 1,188E-06 | 2,383E-05               | 9,824E-07 | 0,876                                       | 0,01908                    |
| ETHANOLAMINE PHOSPHATE           | 2,089E-05 | 7,696E-07 | 3,343E-05               | 2,440E-06 | 1,600                                       | 0,00106                    |
| FUMARATE                         | 4,011E-05 | 3,890E-06 | 1,280E-05               | 1,471E-06 | 0,319                                       | 0,00034                    |
| GLUCONATE                        | 3,418E-04 | 1,357E-05 | 2,865E-04               | 1,170E-05 | 0,838                                       | 0,00592                    |
| GLUTAMATE                        | 4,087E-02 | 1,784E-03 | 1,855E-02               | 2,671E-04 | 0,454                                       | 0,00003                    |
| GLUTAMINE                        | 9,435E-03 | 4,081E-04 | 1,323E-02               | 8,613E-05 | 1,402                                       | 0,00009                    |
| GLUTARATE                        | 9,936E-05 | 1,550E-06 | 1,281E-04               | 1,719E-06 | 1,290                                       | 0,00003                    |
| GLYCEROL 3-PHOSPHATE             | 2,277E-04 | 1,156E-05 | 3,095E-04               | 1,420E-05 | 1,359                                       | 0,00150                    |
| HOMOSERINE                       | 3,322E-04 | 3,853E-06 | 4,327E-04               | 1,150E-05 | 1,303                                       | 0,00014                    |
| HYDROXYPHENYLLACTATE             | 2,304E-04 | 8,281E-06 | 5,984E-04               | 1,455E-05 | 2,597                                       | 0,00000                    |



|                         |           |           |           |           |       |         |
|-------------------------|-----------|-----------|-----------|-----------|-------|---------|
| ISOCITRATE              | 6,011E-04 | 6,756E-05 | 3,176E-04 | 5,849E-06 | 0,528 | 0,00193 |
| ISOLEUCINE              | 7,047E-03 | 7,716E-04 | 1,010E-02 | 1,719E-03 | 1,433 | 0,04852 |
| ISOVALERYLCARNITINE     | 1,958E-02 | 1,842E-03 | 9,942E-03 | 3,538E-04 | 0,508 | 0,00088 |
| KYNURENINE              | 7,456E-04 | 6,601E-05 | 9,847E-04 | 2,988E-05 | 1,321 | 0,00464 |
| L-ALANINE               | 4,227E-05 | 6,571E-06 | 1,492E-05 | 1,492E-06 | 0,353 | 0,00215 |
| L-CARNITINE             | 1,657E-02 | 1,171E-03 | 9,713E-03 | 7,499E-04 | 0,586 | 0,00103 |
| MALATE                  | 1,425E-03 | 2,340E-04 | 5,606E-04 | 5,265E-05 | 0,393 | 0,00336 |
| METHIONINE SULFOXIDE    | 1,708E-05 | 1,779E-06 | 2,345E-05 | 1,988E-06 | 1,373 | 0,01443 |
| N,N,N-TRIMETHYLLYSINE   | 2,293E-05 | 4,227E-06 | 3,205E-05 | 3,121E-06 | 1,398 | 0,03969 |
| N-ACETYLALANINE         | 1,165E-04 | 7,328E-06 | 1,372E-04 | 3,122E-06 | 1,178 | 0,01077 |
| N-ACETYLASPARAGINE      | 9,915E-06 | 1,954E-06 | 1,456E-05 | 1,792E-06 | 1,469 | 0,03853 |
| N-ACETYLGLUTAMATE       | 4,431E-03 | 2,124E-04 | 6,547E-03 | 9,566E-05 | 1,477 | 0,00010 |
| N-ACETYLGLYCINE         | 1,120E-05 | 1,678E-06 | 2,103E-05 | 1,255E-06 | 1,877 | 0,00125 |
| N-ACETYLLEUCINE         | 2,052E-05 | 2,174E-06 | 2,532E-05 | 1,593E-06 | 1,234 | 0,03687 |
| N-ACETYLNEURAMINATE     | 9,578E-04 | 3,646E-05 | 8,776E-04 | 2,484E-05 | 0,916 | 0,03450 |
| N-ACETYSERINE           | 4,934E-05 | 1,374E-05 | 1,178E-04 | 1,526E-05 | 2,387 | 0,00447 |
| N-FORMYL-L-METHIONINE   | 1,021E-04 | 3,177E-06 | 1,202E-04 | 2,207E-06 | 1,178 | 0,00125 |
| O-ACETYLCARNITINE       | 4,420E-03 | 6,630E-04 | 1,161E-02 | 1,334E-03 | 2,627 | 0,00112 |
| O-ACETYLCARNITINE-2     | 2,141E-02 | 2,316E-03 | 4,674E-02 | 5,900E-04 | 2,183 | 0,00005 |
| O-ACETYSERINE           | 1,190E-02 | 1,323E-03 | 4,879E-03 | 2,583E-04 | 0,410 | 0,00084 |
| O-SUCCINYL-HOMOSERINE-1 | 2,795E-05 | 3,860E-06 | 7,040E-06 | 3,532E-06 | 0,252 | 0,00229 |
| OXOGLUTARATE            | 4,734E-05 | 4,801E-06 | 1,933E-05 | 1,883E-06 | 0,408 | 0,00071 |
| PALMITOYLCARNITINE      | 2,274E-05 | 3,467E-06 | 3,161E-05 | 1,522E-06 | 1,390 | 0,01540 |
| PANTOTHENATE            | 3,158E-02 | 1,271E-03 | 3,472E-02 | 7,280E-04 | 1,099 | 0,02060 |
| PHENYLACTATE            | 1,255E-05 | 1,252E-06 | 1,764E-05 | 1,833E-06 | 1,405 | 0,01655 |
| PIPECOLATE              | 3,113E-04 | 5,695E-05 | 7,772E-04 | 1,973E-05 | 2,497 | 0,00018 |
| PROPIONYLCARNITINE      | 2,757E-02 | 2,354E-03 | 2,098E-02 | 1,362E-04 | 0,761 | 0,00839 |
| PTERIN                  | 4,422E-06 | 1,181E-06 | 7,820E-06 | 1,377E-06 | 1,768 | 0,03153 |
| RIBOFLAVIN              | 6,369E-06 | 8,186E-07 | 8,063E-06 | 6,313E-07 | 1,266 | 0,04689 |
| SPERMINE                | 5,946E-03 | 3,788E-04 | 4,726E-03 | 2,789E-04 | 0,795 | 0,01088 |
| SUBERATE                | 2,093E-04 | 9,870E-06 | 2,300E-04 | 8,102E-06 | 1,099 | 0,04816 |
| SUCCINATE               | 4,305E-04 | 4,749E-05 | 3,136E-04 | 7,562E-06 | 0,729 | 0,01360 |
| TRANS-ACONITATE         | 9,442E-05 | 6,004E-06 | 5,469E-05 | 8,025E-06 | 0,579 | 0,00236 |
| TRYPTOPHAN              | 6,212E-03 | 1,676E-04 | 7,609E-03 | 8,517E-05 | 1,225 | 0,00021 |
| TYROSINE                | 1,259E-02 | 2,588E-04 | 1,537E-02 | 3,092E-04 | 1,221 | 0,00028 |
| VALINE                  | 1,762E-04 | 1,502E-05 | 2,394E-04 | 1,993E-05 | 1,359 | 0,01183 |
| XANTHOSINE              | 9,955E-05 | 5,489E-06 | 1,354E-04 | 1,367E-06 | 1,360 | 0,00039 |

**Supplementary Table S4.** Comparison of significantly altered metabolites among the three cell lines treated with CB-839 1  $\mu$ M. Fold change is provided for each significantly altered metabolite. Since there are metabolites that significantly change for one cell line but not for another, “ns” is used for metabolites not significantly changing.

| Compound Name                    | T98G+CB-839 1 $\mu$ M/T98G<br>(Fold change) | LN229+CB-839 1 $\mu$ M/LN229<br>(Fold change) | U87MG+CB-839 1 $\mu$ M/U87MG<br>(Fold change) |
|----------------------------------|---------------------------------------------|-----------------------------------------------|-----------------------------------------------|
| 1-AMINOCYCLOPROPANECARBOXYLATE   | ns                                          | 0,137                                         | 0,219                                         |
| 1-METHYLADENOSINE                | 3,466                                       | ns                                            | ns                                            |
| 1-METHYL-L-HISTIDINE             | 1,231                                       | ns                                            | 1,179                                         |
| 2-AMINOPHENOL-2                  | 0,616                                       | ns                                            | ns                                            |
| 2-ETHYL-2-HYDROXYBUTYRIC ACID    | 0,565                                       | 0,753                                         | ns                                            |
| 2-HYDROXYBUTYRATE                | 0,645                                       | ns                                            | ns                                            |
| 2-HYDROXYGLUTARIC                | 0,216                                       | 0,792                                         | 0,636                                         |
| 3-(2-HYDROXYPHENYL)PROPANOATE    | 2,158                                       | 2,529                                         | 1,372                                         |
| 3,4-DIHYDROXYHYDROCINNAMIC ACID  | 3,375                                       | 6,549                                         | 2,590                                         |
| 3,4-DIHYDROXYPHENYLACETATE-1     | ns                                          | 1,433                                         | ns                                            |
| 3,4-DIHYDROXYPHENYLACETATE-2     | ns                                          | 1,418                                         | ns                                            |
| 3-AMINO-5-HYDROXYBENZOATE        | ns                                          | 0,316                                         | 3,387                                         |
| 3-HYDROXYBENZALDEHYDE            | 2,050                                       | ns                                            | 2,088                                         |
| 3-HYDROXYOCTANOIC ACID           | ns                                          | 0,63516566                                    | ns                                            |
| 3-METHOXYTYROSINE                | 1,452                                       | 1,247                                         | ns                                            |
| 3-METHYL-2-OXOVALERATE           | 0,389                                       | ns                                            | ns                                            |
| 3-METHYLADENINE-3                | 2,685                                       | 2,584                                         | 2,466                                         |
| 3-PHOSPHOGLYCERATE               | ns                                          | 0,636                                         | ns                                            |
| 3-SULFINOALANINE                 | ns                                          | 0,647                                         | ns                                            |
| 4-ACETAMIDOBUTANOATE             | 1,639                                       | 2,006                                         | 1,485                                         |
| 4-GUANIDINOBUTANOATE             | ns                                          | 0,695                                         | ns                                            |
| 4-GUANIDINOBUTANOATE-2           | 0,611                                       | 0,816                                         | ns                                            |
| 4-HYDROXYPHENYL-2-PROPIONIC ACID | 2,145                                       | 2,826                                         | 1,470                                         |
| 5-AMINOPENTANOATE                | 1,607                                       | 1,405                                         | ns                                            |
| 5-AMINOPENTANOIC ACID            | 0,148                                       | 0,488                                         | 0,815                                         |
| 5-HYDROXYTRYPTOPHAN              | 1,100                                       | ns                                            | ns                                            |
| 5-METHYLCYTOSINE                 | 22,113                                      | ns                                            | ns                                            |
| 5-METHYLURIDINE                  | 0,753                                       | ns                                            | ns                                            |
| 6-HYDROXYDOPAMINE                | 4,847                                       | 1,653                                         | 1,703                                         |
| 6-PHOSPHOGLUCONATE               | ns                                          | ns                                            | 0,498                                         |
| 6-PHOSPHONOGLUCONO-D-LACTONE     | ns                                          | 0,382                                         | 0,390                                         |
| 7-HYDROXYOCTANOATE               | 3,515                                       | ns                                            | ns                                            |
| 8-HYDROXY-DEOXYGUANOSINE         | ns                                          | 1,743                                         | ns                                            |
| ACETOACETATE                     | 0,169                                       | 0,651                                         | 0,651                                         |
| ACETOIN                          | ns                                          | 1,435                                         | ns                                            |
| ADENOSINE                        | ns                                          | ns                                            | 0,592                                         |
| AICAR                            | 9,671                                       | ns                                            | 2,646                                         |
| ALPHA-KETOISOVALERATE            | 0,504                                       | 1,306                                         | 0,816                                         |
| AMINOADIPATE                     | 0,143                                       | 0,392                                         | 0,720                                         |
| ARGININE                         | ns                                          | 1,337                                         | ns                                            |

|                              |       |       |       |
|------------------------------|-------|-------|-------|
| ARGININOSUCCINATE            | 0,099 | 0,625 | 0,370 |
| ASPARTATE                    | 0,046 | 0,056 | 0,297 |
| BETAINE                      | 2,388 | 2,099 | 2,070 |
| BIS(2-ETHYLHEXYL)PHTHALATE   | ns    | 2,840 | ns    |
| BUTYRYLCARNITINE             | 0,364 | 0,813 | 0,831 |
| CHENODEOXYCHOLIC ACID        | ns    | 8,326 | ns    |
| CDP-ETHANOLAMINE             | 0,822 | ns    | ns    |
| CIS-ACONITATE-1              | 0,109 | 0,666 | 0,464 |
| CIS-ACONITATE-2              | 0,388 | 0,547 | 0,613 |
| CITRATE                      | 0,101 | 0,592 | 0,434 |
| CITRULLINE                   | 1,865 | 1,324 | 1,814 |
| CREATINE                     | 1,147 | ns    | ns    |
| CYCLIC AMP                   | 0,800 | 0,627 | ns    |
| CYCLIC GMP                   | 0,713 | ns    | ns    |
| CYSTATHIONINE                | ns    | 0,776 | ns    |
| CYSTEINE                     | ns    | 2,377 | ns    |
| DECADIENOYLCARNITINE-2       | 1,277 | ns    | ns    |
| DECANOYLCARNITINE            | ns    | 0,858 | ns    |
| DECENOYLCARNITINE            | 0,319 | ns    | ns    |
| DEOXYADENOSINE MONOPHOSPHATE | 0,397 | ns    | 0,600 |
| DEOXYCARNITINE               | ns    | 0,824 | ns    |
| DEOXYCHOLATE                 | ns    | 8,307 | ns    |
| DEOXYCHOLIC ACID             | ns    | 8,256 | ns    |
| DEOXYCYTIDINE-1              | 5,328 | 3,247 | ns    |
| DEOXYCYTIDINE-DIPHOSPHATE    | 0,619 | ns    | ns    |
| DEOXYGUANOSINE-MONOPHOSPHATE | 0,358 | ns    | ns    |
| DEOXYURIDINE                 | ns    | 1,693 | ns    |
| D-GLUCURONOLACTONE           | 1,767 | 1,542 | ns    |
| DL-2-AMINOCTANOATE           | 2,209 | 1,489 | ns    |
| DOPAMINE-3                   | 0,491 | ns    | 0,876 |
| D-RIBOSE 5-PHOSPHATE         | 1,620 | 1,421 | ns    |
| ETHANOLAMINE PHOSPHATE       | 2,766 | 2,104 | 1,600 |
| FRUCTOSE 1,6-BISPHOSPHATE    | 1,768 | 2,334 | ns    |
| FRUCTOSE 6-PHOSPHATE         | 2,180 | 1,410 | ns    |
| FUMARATE                     | 0,016 | 0,176 | 0,319 |
| GLUCONATE                    | ns    | ns    | 0,838 |
| GLUCONOLACTONE               | 2,040 | ns    | ns    |
| GLUTAMATE                    | 0,164 | 0,275 | 0,454 |
| GLUTAMINE                    | 1,700 | 1,422 | ns    |
| GLUTARATE                    | ns    | 1,428 | 1,290 |
| GLUTATHIONE REDUCED          | 0,806 | 0,740 | ns    |
| GLYCERALDEHYDE 3-PHOSPHATE   | 0,732 | ns    | ns    |
| GLYCERATE                    | 0,344 | ns    | ns    |
| GLYCEROL 3-PHOSPHATE         | 1,586 | ns    | 1,359 |
| GLYCINE                      | 2,257 | 1,897 | ns    |
| GUANINE-1                    | ns    | 1,904 | ns    |

|                           |        |       |       |
|---------------------------|--------|-------|-------|
| GUANINE-2                 | 1,221  | ns    | ns    |
| GUANOSINE                 | ns     | 1,944 | ns    |
| GUANOSINE MONOPHOSPHATE   | ns     | 0,755 | ns    |
| HEXANOYLCARNITINE         | 0,431  | ns    | ns    |
| HEXOSE                    | ns     | 0,498 | ns    |
| HISTIDINE                 | 1,225  | ns    | ns    |
| HOMOCYSTEINE THIOLACTONE  | 1,388  | 1,248 | ns    |
| HOMOSERINE                | 1,534  | 1,288 | 1,303 |
| HYDROQUINONE              | 0,643  | ns    | ns    |
| HYDROXYKYNURENINE         | ns     | 0,770 | ns    |
| HYDROXYPHENYLLACTATE      | 3,376  | 6,572 | 2,597 |
| HYPOXANTHINE              | 6,616  | 2,141 | ns    |
| INDOLEACETALDEHYDE        | 1,781  | 4,537 | ns    |
| INOSINE                   | ns     | 2,392 | ns    |
| INOSINE MONOPHOSPHATE     | 15,874 | 2,170 | ns    |
| ISOCITRATE                | 0,221  | ns    | 0,528 |
| ISOLEUCINE                | 1,380  | 1,349 | 1,433 |
| ISOVALERYLCARNITINE       | 0,296  | ns    | 0,508 |
| KYNURENINE                | 1,266  | 1,191 | 1,321 |
| L-ALANINE                 | 0,076  | 0,057 | 0,353 |
| L-CARNITINE               | 0,274  | 0,719 | 0,586 |
| LEUCINE                   | 1,466  | 1,338 | ns    |
| L-ORNITHINE               | ns     | 1,416 | ns    |
| LYSINE                    | ns     | 1,249 | ns    |
| MALATE                    | 0,047  | 0,212 | 0,393 |
| METHIONINE SULFOXIDE      | 1,844  | 1,598 | 1,373 |
| METHIONINE-1              | 1,321  | 1,327 | ns    |
| METHIONINE-2              | 1,394  | 1,480 | ns    |
| METHYLTHIOADENOSINE       | 1,261  | ns    | ns    |
| MEVALONATE                | ns     | 0,689 | ns    |
| N,N,N-TRIMETHYLLYSINE     | 2,171  | 1,406 | 1,398 |
| N1-ACETYLSPERMINE         | 2,604  | ns    | ns    |
| N-A-ACETYL-L-ARGININE     | 1,772  | ns    | ns    |
| N-ACETYLANALANINE         | 0,753  | ns    | 1,178 |
| N-ACETYLASPARAGINE        | 3,386  | 2,957 | 1,469 |
| N-ACETYLASPARTATE         | 0,702  | 0,720 | ns    |
| N-ACETYLASPARTYLGLUTAMATE | 0,753  | ns    | ns    |
| N-ACETYLGUTAMATE          | 1,573  | 1,882 | 1,477 |
| N-ACETYLGLYCINE           | 2,255  | 1,814 | 1,877 |
| N-ACETYLLEUCINE           | ns     | ns    | 1,234 |
| N-ACETYLMETHIONINE        | 0,833  | ns    | ns    |
| N-ACETYLNEURAMINATE       | 0,805  | 0,492 | 0,916 |
| N-ACETYLPHENYLALANINE     | 1,727  | ns    | ns    |
| N-ACETYLPUTRESCINE        | ns     | 6,001 | ns    |
| N-ACETYLSERINE            | 2,787  | 2,412 | 2,387 |
| N-FORMYL-L-METHIONINE     | 1,247  | ns    | 1,178 |

|                              |        |       |       |
|------------------------------|--------|-------|-------|
| NICOTINAMIDE MONONUCLEOTIDE  | 1,397  | ns    | ns    |
| N-METHYLGLUTAMATE            | 0,164  | 0,396 | ns    |
| O-ACETYLCARNITINE            | 11,372 | 2,006 | 2,627 |
| O-ACETYLCARNITINE-2          | 11,453 | 2,255 | 2,183 |
| O-ACETYLSERINE               | 0,147  | 0,230 | 0,410 |
| O-SUCCINYL-HOMOSERINE-1      | 0,244  | 0,416 | 0,252 |
| OXOGLUTARATE                 | 0,075  | 0,314 | 0,408 |
| PALMITOYLCARNITINE           | ns     | 1,771 | 1,390 |
| PANTOTHENATE                 | ns     | ns    | 1,099 |
| PHENYLALANINE                | 1,205  | 1,175 | ns    |
| PHENYLETHANOLAMINE           | ns     | 1,198 | ns    |
| PHENYLLACTATE                | 2,165  | ns    | 1,405 |
| PHOSPHOCREATINE              | ns     | 0,419 | ns    |
| PHOSPHORYLCHOLINE            | 1,540  | 1,274 | ns    |
| PHOSPHOSERINE                | 0,274  | 0,251 | ns    |
| PIPECOLATE                   | 2,576  | 5,066 | 2,497 |
| P-OCTOPAMINE                 | 2,455  | ns    | ns    |
| PORPHOBILINOGEN-2            | 0,403  | 0,727 | ns    |
| PROLINE                      | 0,647  | 0,144 | ns    |
| PROPIONYLCARNITINE           | 0,636  | ns    | 0,761 |
| PROPIONYLCHOLINE             | ns     | 0,604 |       |
| PTERIN                       | ns     | ns    | 1,768 |
| PUTRESCINE-NH3               | ns     | 1,299 | ns    |
| PYRIDOXAL-PHOSPHATE          | 1,360  |       | ns    |
| PYRIDOXINE-1                 | 0,761  |       | ns    |
| PYRIDOXINE-2                 | 0,728  |       | ns    |
| PYROGLUTAMATE                | 0,762  | 1,319 | ns    |
| PYRUVATE                     | 0,448  | 0,405 | ns    |
| RIBOFLAVIN                   | ns     | ns    | 1,266 |
| S-ADENOSYLMHOCYSTEINE-1      | ns     | 0,622 | ns    |
| SALSOLINOL-1                 | ns     | 0,802 | ns    |
| SALSOLINOL-2                 | ns     | 0,829 | ns    |
| SARCOSINE                    | 1,155  | ns    | ns    |
| SEDOHEPTULOSE-7-PHOSPHATE    | 4,337  | 3,558 | ns    |
| SPERMIDINE                   | 1,253  | 1,315 | ns    |
| SPERMINE                     | 0,644  | ns    | 0,795 |
| SUBERATE                     | ns     | ns    | 1,099 |
| SUCCINATE                    | 0,638  | 0,534 | 0,729 |
| TAURINE                      | ns     | 0,492 | ns    |
| THREONINE                    | 1,444  | ns    | ns    |
| THYMIDINE-MONOPHOSPHATE      | 0,514  | 0,609 | ns    |
| TRANS-2-OCTENOYL-L-CARNITINE | ns     | 0,808 | ns    |
| TRANS-ACONITATE              | 0,270  | ns    | 0,579 |
| TRIGONELLINE                 | 0,623  | 0,331 | ns    |
| TRIMETHYLAMINE               | 0,335  | 0,745 | ns    |
| TRYPTOPHAN                   | 1,438  | 1,465 | 1,225 |

|                       |       |       |       |
|-----------------------|-------|-------|-------|
| TYRAMINE              | 2,012 | 1,303 | ns    |
| TYROSINE              | 1,519 | 1,477 | 1,221 |
| URACIL-1              | 0,492 | 0,617 | ns    |
| URIDINE MONOPHOSPHATE | 0,481 | 0,445 | ns    |
| VALINE                | 2,052 | 1,366 | 1,359 |
| XANTHOSINE            | ns    | 1,241 | 1,360 |

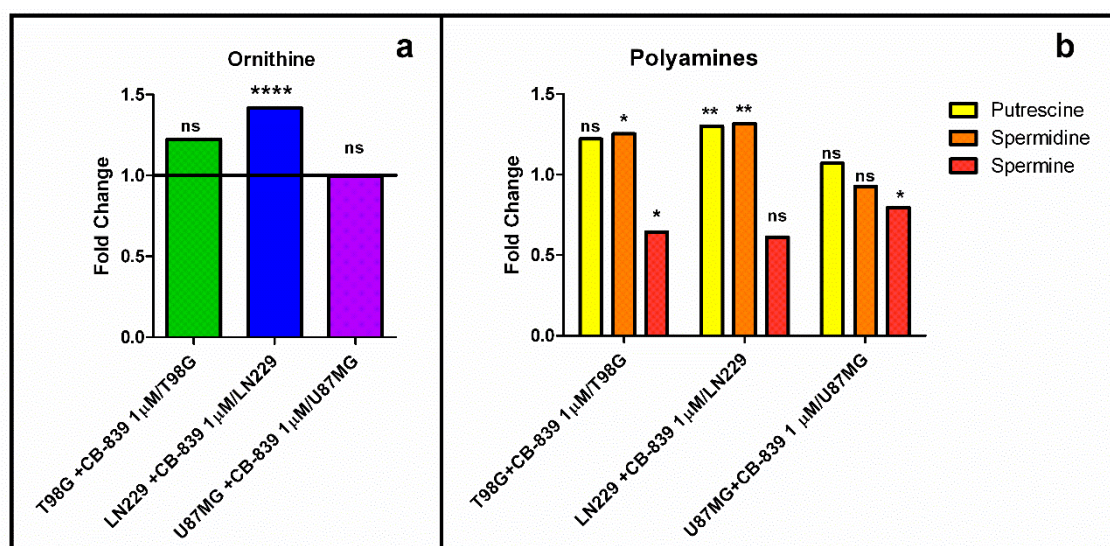

**Figure S1.** Ornithine (a) and polyamines (b) levels upon GLS inhibition by CB-839. The samples were run in triplicate. For more details, see “Material and Methods”. ns: non-significant.

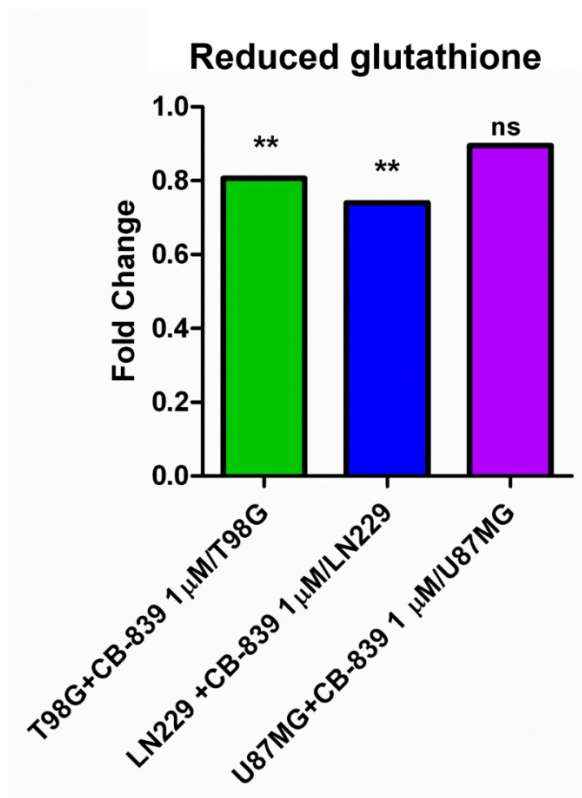

**Figure S2.** Glutathione levels upon GLS inhibition by CB-839. The samples were run in triplicate. For more details, see “Material and Methods”. ns: non-significant.

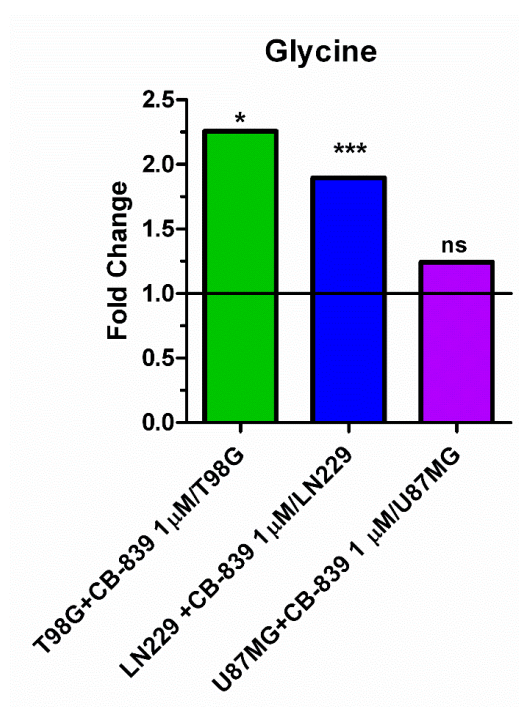

**Figure S3.** Glycine levels upon GLS inhibition by CB-839. The samples were run in triplicate. For more details, see “Material and Methods”. ns: non-significant.

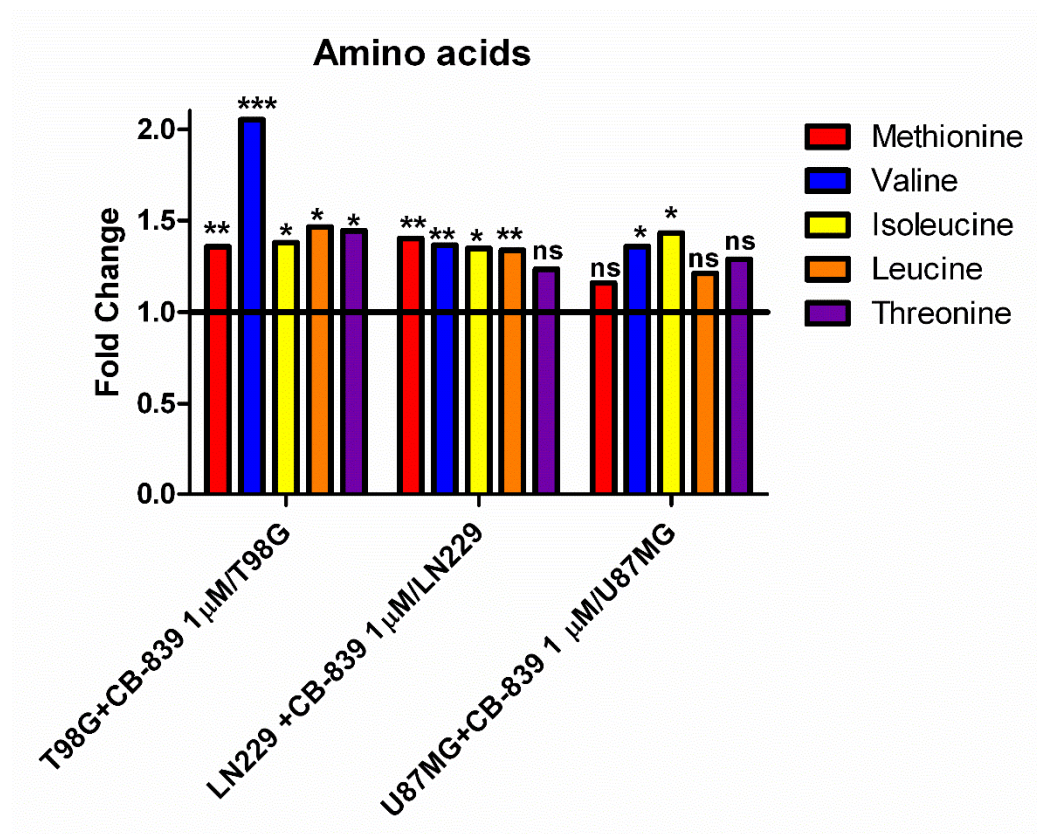

**Figure S4.** Levels of some amino acids upon GLS inhibition by CB-839. The samples were run in triplicate. For more details, see "Material and Methods". ns: non-significant.
